# Supplementary material for: Synthesis of hierarchically porous silicas with mesophase transformations in a four-component microemulsion-type system and the catalytic performance for dibenzothiophene hydrodesulfurization
Source: Royal Society of Chemistry journal article supplement (doi:10.1039/c3ta14859a), 2014-01-01
Supplement: c3ta14859a1.pdf [file c3ta14859a1.pdf]

## *Supporting Information*

### **Synthesis of Hierarchically Porous Silicas with Mesophase Transformations in Quadru-Component Microemulsion-Type System and the Catalytic Performance for Dibenzothiophene Hydrodesulfurization**

Xiaofeng Zhou,<sup>‡,a</sup> Aijun Duan,<sup>‡,a</sup> Zhen Zhao,<sup>\*,a</sup> Yanjun Gong,<sup>\*,b</sup> Huadong Wu,<sup>a</sup> Jianmei Li,<sup>c</sup> Yuechang Wei,<sup>a</sup> Guiyuan Jiang,<sup>a</sup> Jian Liu,<sup>a</sup> Ying Zhang<sup>c</sup>

<sup>a</sup> State Key Laboratory of Heavy Oil Processing, China University of Petroleum, Beijing 102249, P. R. China.

<sup>b</sup> CNPC Key Laboratory of Catalysis, China University of Petroleum, Beijing 102249, P. R. China.

<sup>c</sup> College of Science, China University of Petroleum, Beijing 102249, P. R. China.

\*Corresponding author: zhenzhao@cup.edu.cn and gongyj@cup.edu.cn

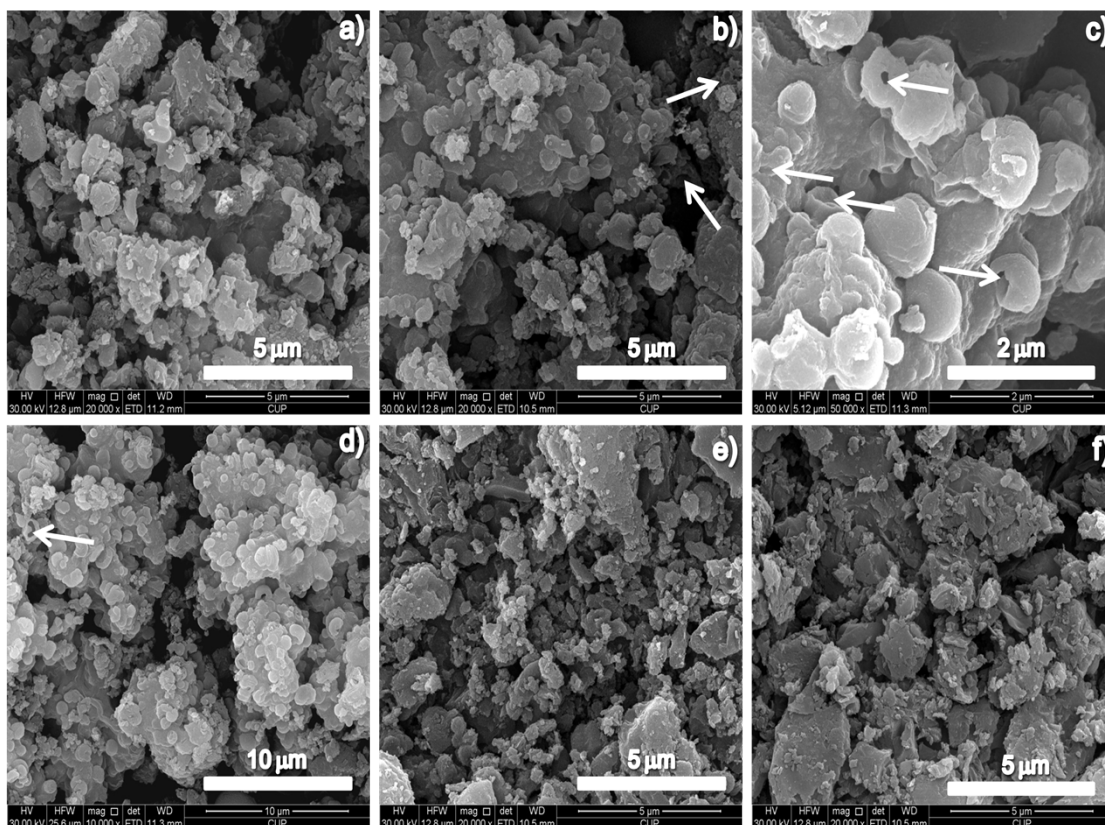

**Figure S1.** SEM images of calcined mesostructured silicas synthesized with different Bu/TMB molar ratios. a) MS-Bu-0, b) MS-Bu-0.5, c) MS-Bu-1, d) MS-Bu-2, e) MS-Bu-3, f) MS-Bu-4.

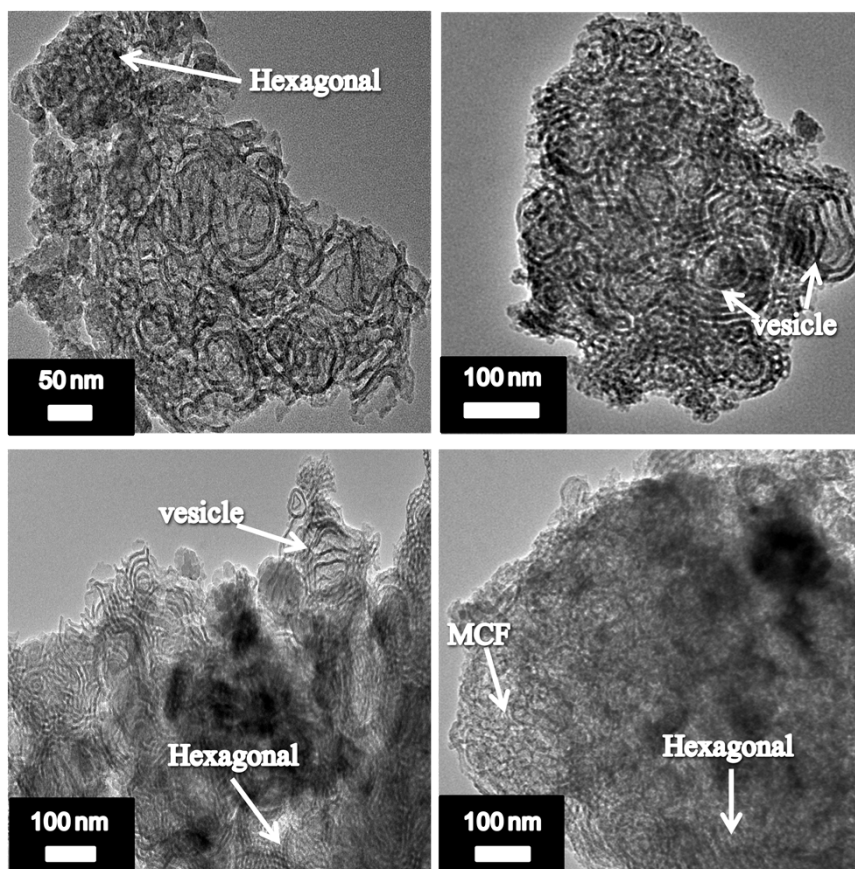

**Figure S2.** Representative TEM images of MS-TMB-1 calcined sample synthesized with the molar ratio TMB/Bu=1.

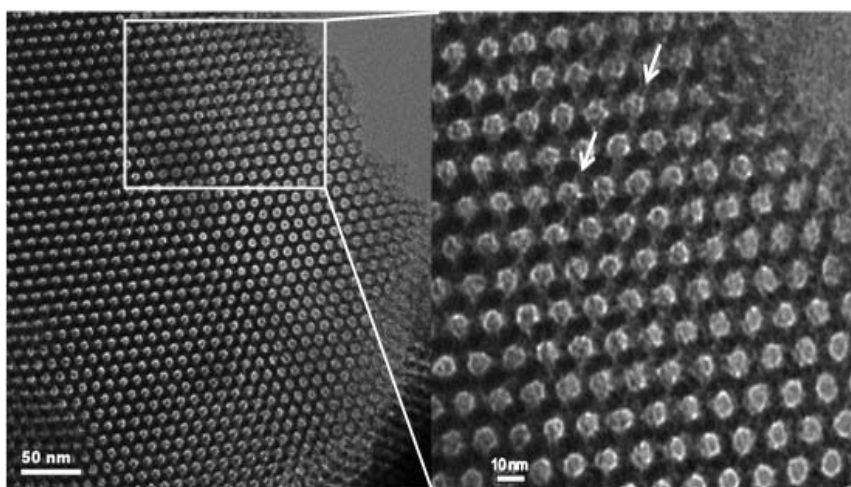

**Figure S3.** TEM images of the calcined sample MS-TMB-0 with the molar ratio TMB/Bu=0.

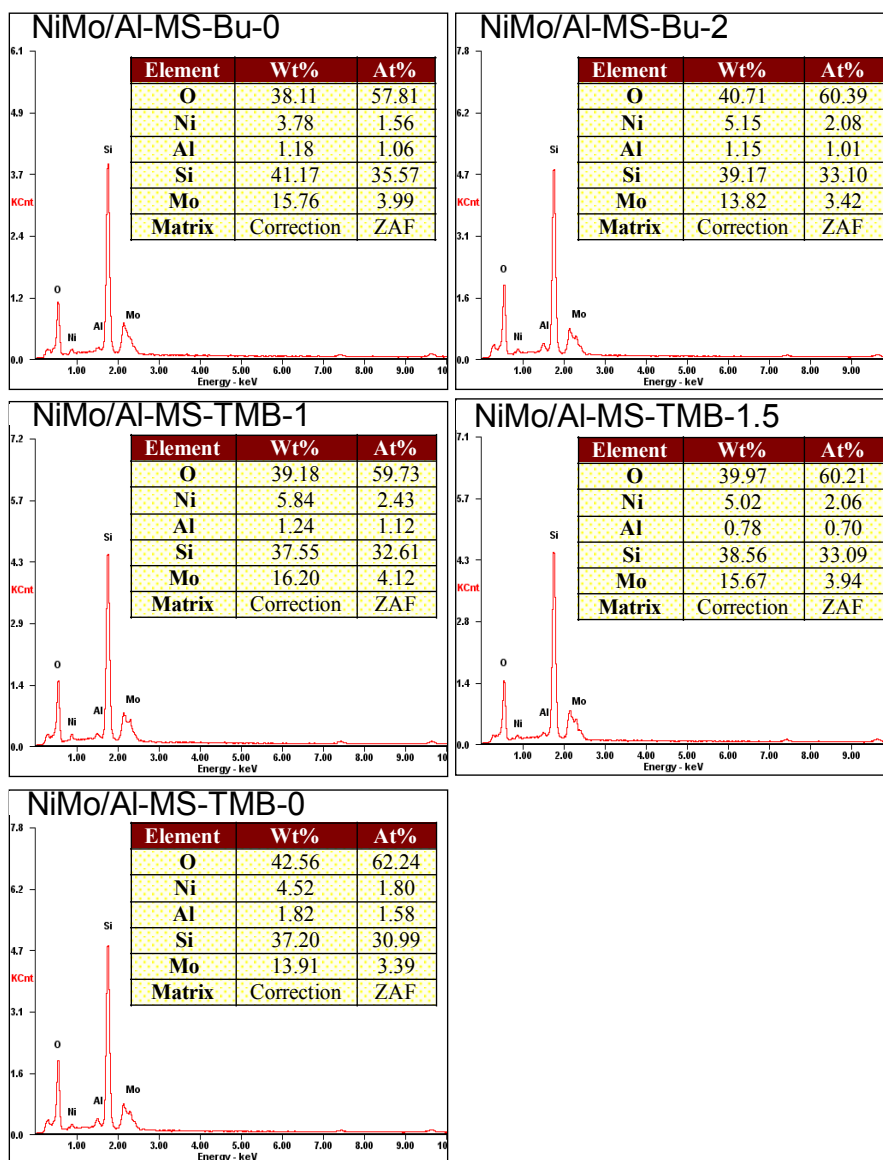

Figure S4. SEM-EDS elemental analysis results of all the prepared NiMo/Al-MS catalysts.

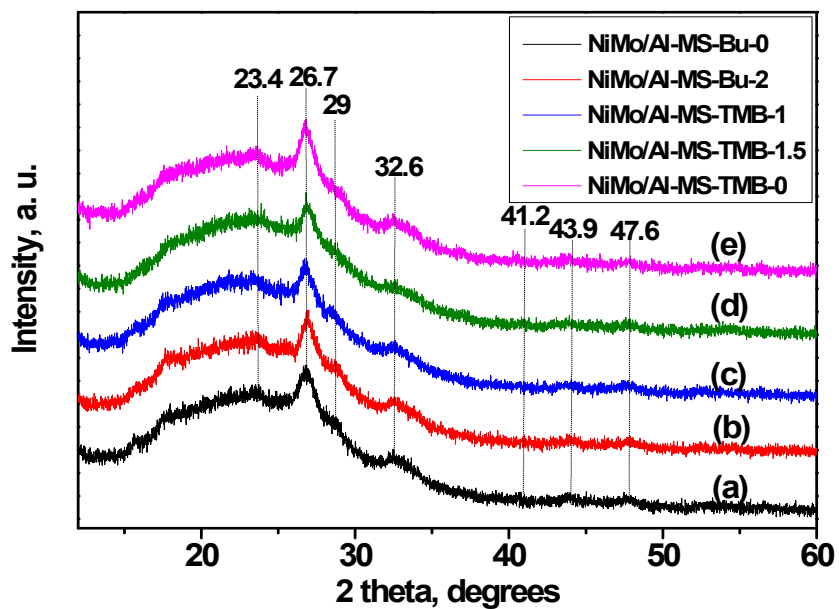

**Figure S5.** High angle XRD patterns of all the prepared NiMo/Al-MS catalysts. (a) NiMo/Al-MS-Bu-0, (b) NiMo/Al-MS-Bu-2, (c) NiMo/Al-MS-TMB-1, (d) NiMo/Al-MS-TMB-1.5, (e) NiMo/Al-MS-TMB-0.

**Table S1. Texture parameters of the hierarchically porous silicas synthesized with different Bu/TMB molar ratios**

| Sample    | Structure <sup>a</sup> | d spacing<br>[nm] <sup>b</sup> | BET surface area<br>[m <sup>2</sup> ·g <sup>-1</sup> ] | Total Pore Volume<br>[cm <sup>3</sup> ·g <sup>-1</sup> ] | t-plot<br>[cm <sup>3</sup> ·g <sup>-1</sup> ] | Pore diameter<br>[nm] <sup>c</sup> |
|-----------|------------------------|--------------------------------|--------------------------------------------------------|----------------------------------------------------------|-----------------------------------------------|------------------------------------|
| MS-Bu-0   | MCF                    | -                              | 624                                                    | 0.91                                                     | 0.14                                          | 11.5                               |
| MS-Bu-0.5 | Hex+Ves                | -                              | 812                                                    | 1.11                                                     | 0.19                                          | 5.6, 7.7                           |
| MS-Bu-1   | Hex+Ves                | -                              | 622                                                    | 0.88                                                     | 0.15                                          | 8.0                                |
| MS-Bu-2   | Ves                    | -                              | 481                                                    | 1.34                                                     | 0.084                                         | 5.6, 17.9                          |
| MS-Bu-3   | Hex                    | 10.9                           | 747                                                    | 0.87                                                     | 0.21                                          | 8.8                                |
| MS-Bu-4   | Hex                    | 10.6                           | 693                                                    | 0.73                                                     | 0.21                                          | 7.8                                |

<sup>a</sup> For the structure of materials, “Hex” represents “hexagonal”, “Ves” denotes “vesicle” and “MCF” stands for “mesocellular foam”.

<sup>b</sup> The d-spacing values were calculated from the prime peak in Figure 1.

<sup>c</sup> Determined from the adsorption branch on the basis of BJH model.

**Table S2. Texture parameters of the hierarchically porous silicas synthesized with different TMB/Bu molar ratios**

| Sample      | Structure <sup>a</sup> | d spacing<br>[nm] <sup>b</sup> | BET surface area<br>[m <sup>2</sup> ·g <sup>-1</sup> ] | Total Pore Volume<br>[cm <sup>3</sup> ·g <sup>-1</sup> ] | t-plot<br>[cm <sup>3</sup> ·g <sup>-1</sup> ] | Pore diameter<br>[nm] <sup>c</sup> |
|-------------|------------------------|--------------------------------|--------------------------------------------------------|----------------------------------------------------------|-----------------------------------------------|------------------------------------|
| MS-TMB-0    | Hex                    | 10.3                           | 805                                                    | 1.04                                                     | 0.14                                          | 9.6                                |
| MS-TMB-0.12 | Hex                    | 10.5                           | 654                                                    | 0.97                                                     | 0.17                                          | 9.8                                |
| MS-TMB-0.24 | Hex                    | 10.7                           | 708                                                    | 0.96                                                     | 0.13                                          | 9.9                                |
| MS-TMB-0.38 | Hex                    | 10.8                           | 719                                                    | 0.94                                                     | 0.16                                          | 10.0                               |
| MS-TMB-1    | Hex+Ves+MCF            | -                              | 665                                                    | 1.13                                                     | 0.18                                          | 7.7, 12.6                          |
| MS-TMB-1.5  | SBA+MCF                | -                              | 694                                                    | 1.20                                                     | 0.14                                          | 9.8, 13.2                          |
| MS-TMB-2    | SBA+MCF                | -                              | 640                                                    | 1.21                                                     | 0.13                                          | 12.5, 17.9                         |

<sup>a</sup> For the structure of materials, “Hex” represents “hexagonal”, “Ves” denotes “vesicle”, “SBA” in the name of “disordered-SBA-15-type” “MCF” stands for “mesocellular foam”.

<sup>b</sup> The d-spacing values were calculated from the prime peak in Figure 4.

<sup>c</sup> Determined from the adsorption branch on the basis of BJH model.

**Table S3. The analysis results of Si/Al molar ratio by ICP-OES for the Al-MS materials**

| Sample                   | Structure <sup>a</sup> | Si/Al molar ratio |
|--------------------------|------------------------|-------------------|
| Al-MS-Bu-0 (Si/Al=20)    | MCF                    | 24.4              |
| Al-MS-Bu-2 (Si/Al=20)    | Ves                    | 25.4              |
| Al-MS-TMB-1 (Si/Al=20)   | Hex+Ves+MCF            | 24.0              |
| Al-MS-TMB-1.5 (Si/Al=20) | SBA+MCF                | 25.6              |
| Al-MS-TMB-0 (Si/Al=20)   | Hex                    | 24.8              |

<sup>a</sup> For the structure of materials, “Hex” represents “hexagonal”, “Ves” denotes “vesicle”, “SBA” in the name of “disordered-SBA-15-type” “MCF” stands for “mesocellular foam”.
